# Supplementary material
Source: publisher site journal article supplement (https://www.kjim.org/upload/media/kjim-2018-312-suppl1.pdf)
Supplement: Supplementary file 1 [file kjim-2018-312-suppl1.pdf]

**Supplementary Table 1. The definition of atherosclerotic cardiovascular disease**

|                                                 |                                                                                                                                                                                                                                                                                                                                                                                                                                                    |
|-------------------------------------------------|----------------------------------------------------------------------------------------------------------------------------------------------------------------------------------------------------------------------------------------------------------------------------------------------------------------------------------------------------------------------------------------------------------------------------------------------------|
| CAD                                             | - AMI: I21- or<br>- Revascularization: CAD percutaneous procedure or coronary bypass surgery                                                                                                                                                                                                                                                                                                                                                       |
| Diagnosis                                       | Myocardial infarction (I21-)<br>- ST elevation (STEMI) and non-ST elevation (NSTEMI) myocardial infarction I21-                                                                                                                                                                                                                                                                                                                                    |
| Percutaneous procedure <sup>a</sup>             | Percutaneous transluminal coronary angioplasty (M6551, M6552)<br>Percutaneous transcatheter placement of intracoronary stent (M6561-4)<br>Percutaneous transluminal coronary atherectomy (M6571-2)<br>Percutaneous mechanical thrombolysis (M6633) <sup>b</sup><br>Percutaneous thrombolytic treatment, coronary artery (M6634)<br>Percutaneous intravascular atherectomy (M6620) <sup>b</sup>                                                     |
| Coronary bypass surgery <sup>a</sup>            | Vascular bypass operation, aorta-coronary (O1641, O1642, O1647, OA641, OA642, OA647)                                                                                                                                                                                                                                                                                                                                                               |
| CVD                                             | - Cerebral infarction: I63- or<br>- Revascularization: CVD percutaneous procedure or surgery                                                                                                                                                                                                                                                                                                                                                       |
| Diagnosis                                       | Cerebral infarction (I63-)                                                                                                                                                                                                                                                                                                                                                                                                                         |
| Percutaneous procedure <sup>a</sup>             | Percutaneous thrombus removal, cerebral (M6631)<br>Percutaneous transluminal angioplasty, cerebral and carotid (M6593-4)<br>Percutaneous cerebral angioplasty with drug (M6599)<br>Percutaneous intravascular installation of metallic stent cerebral and carotid (M6601-2)<br>Percutaneous intravascular atherectomy (M6620) <sup>c</sup><br>Percutaneous mechanical thrombolysis (M6633) <sup>c</sup>                                            |
| Surgery (transluminal atherectomy) <sup>a</sup> | Transluminal atherectomy, carotid artery (O 0226, O 0227, O 2066)                                                                                                                                                                                                                                                                                                                                                                                  |
| PAD                                             | - PAD diagnosis (I70.2-3, I70.9, I73.1, or I73.8-9) AND<br>- Percutaneous angioplasty or transluminal atherectomy or open revascularization or amputation                                                                                                                                                                                                                                                                                          |
| Diagnosis                                       | Atherosclerosis of upper/lower limb (I70.2-3); atherosclerosis, unspecified (I70.9); thromboangiitis obliterans (I73.1); peripheral vascular disease (I73.8-9)                                                                                                                                                                                                                                                                                     |
| Percutaneous angioplasty <sup>a</sup>           | Percutaneous transluminal angioplasty, others (M6597)<br>Percutaneous intravascular installation of metallic stent, others (M6605)<br>Percutaneous intravascular installation of stent-graft, aorta and iliac (M6612)<br>Percutaneous intravascular installation of stent-graft, others (M6613)<br>Percutaneous thrombus removal, others (M6632)<br>Percutaneous intravascular atherectomy (M6620)<br>Percutaneous mechanical thrombolysis (M6633) |
| Transluminal atherectomy <sup>a</sup>           | Transluminal atherectomy, abdominal or iliac artery (O 2064, O 2067, O 2065, O 2068)                                                                                                                                                                                                                                                                                                                                                               |
| Open revascularization <sup>a</sup>             | Vascular bypass operation, artery, others (O1643-4, O0161–O0171, O1645–6)                                                                                                                                                                                                                                                                                                                                                                          |

Diagnoses were coded according to the International Classification of Disease, 10th revision and procedures or surgeries are used with the Healthcare Common Procedure Coding System codes provided by the Health Insurance Review and Assessment (HIRA) service.

CAD, coronary artery disease; AMI, acute myocardial infarction; CVD, cerebrovascular disease; PAD, peripheral artery disease.

<sup>a</sup>Healthcare Common Procedure Coding System codes provided by HIRA.

<sup>b</sup>Procedure under diagnosis code of (I20–I25).

<sup>c</sup>Procedure under diagnosis code of (I63, I65-66, I67.2).
